# Supplementary material for: The Protein Landscape of Mucinous Ovarian Cancer: Towards a Theranostic
Source: MDPI journal article supplement (doi:10.3390/cancers13225596), 2021-11-09
Supplement: s1 [file s1]

## Supplementary File S3: TARGET CHARACTERISTICS

**Table 1** Characteristics of proteins in immunohistochemistry studies

| Protein <sup>1</sup> | Number of Included Studies | Expression in MOC compared to controls/other tissues <sup>2</sup> | Cellular localisation <sup>3</sup> |
|----------------------|----------------------------|-------------------------------------------------------------------|------------------------------------|
| AGR2                 | 2                          | Elevated                                                          | C                                  |
| AMACR                | 1                          | Elevated                                                          | C                                  |
| ARID1A               | 1                          | Non-specific                                                      | N                                  |
| B-CATENIN            | 1                          | Non-specific                                                      | M                                  |
| BAX                  | 1                          | Non-specific                                                      | C, M                               |
| BCL2                 | 1                          | Non-specific                                                      | C, M                               |
| C-KIT                | 1                          | Reduced                                                           | NA                                 |
| MUC16                | 1                          | Non-specific                                                      | M, S                               |
| CA19.9               | 1                          | Non-specific                                                      | G                                  |
| CDX2                 | 5                          | Non-specific                                                      | N                                  |
| CEACAM6              | 1                          | Elevated                                                          | CS, CM                             |
| CEP55                | 1                          | Elevated                                                          | C                                  |
| CHEK1                | 1                          | Non-specific                                                      | N                                  |
| CK20                 | 5                          | Non-specific                                                      | C                                  |
| CK7                  | 5                          | Non-specific                                                      | C                                  |
| CKIe                 | 1                          | Elevated                                                          | C, N                               |
| COL3A1               | 1                          | Elevated                                                          | C                                  |
| COX2                 | 1                          | Non-specific                                                      | N                                  |
| CRK                  | 1                          | Elevated                                                          | C, N                               |
| CtBP-2               | 1                          | Elevated                                                          | N                                  |
| DPEP1                | 1                          | Reduced                                                           | NA                                 |
| EMMPRIN              | 1                          | Reduced                                                           | NA                                 |
| ER                   | 2                          | Elevated                                                          | N                                  |
| FGF18                | 1                          | Elevated                                                          | C                                  |
| FIBRONECTIN 1        | 1                          | Elevated                                                          | S                                  |
| FOXM1                | 1                          | Elevated                                                          | C                                  |
| FRA                  | 2                          | Elevated                                                          | S, CM, E                           |
| GIT1                 | 1                          | Reduced                                                           | NA                                 |
| GPR158               | 1                          | Elevated                                                          | CM                                 |
| HER2                 | 4                          | Elevated                                                          | CM, N, E, C                        |
| HNFIB                | 1                          | Non-specific                                                      | N                                  |
| hRad17               | 1                          | Elevated                                                          | N                                  |
| IL-1B                | 1                          | Non-specific                                                      | NA                                 |
| IL-6                 | 1                          | Non-specific                                                      | NA                                 |
| INI                  | 1                          | Non-specific                                                      | N                                  |
| INOS                 | 1                          | Non-specific                                                      | C                                  |
| INTEGRIN, A2         | 1                          | Non-specific                                                      | M                                  |
| KIF23                | 1                          | Non-specific                                                      | N                                  |
| LATSr                | 1                          | Reduced                                                           | NA                                 |

|                 |   |              |        |
|-----------------|---|--------------|--------|
| MDM2            | 1 | Elevated     | N      |
| METALLOTHIONEIN | 1 | Elevated     | C      |
| MTAP            | 1 | Non-specific | C, N   |
| MUC2            | 2 | Non-specific | S      |
| MUC5AC          | 2 | Non-specific | S      |
| NF-KB           | 1 | Non-specific | N      |
| NHE1            | 1 | Elevated     | CM, ER |
| Octamer-4       | 1 | Reduced      | NA     |
| P16             | 1 | Elevated     | N      |
| P21             | 1 | Elevated     | N      |
| P53             | 6 | Elevated     | N      |
| PARPBP          | 1 | Elevated     | N      |
| PAX2            | 2 | Elevated     | N      |
| PAX8            | 6 | Elevated     | N      |
| PCLP1           | 1 | Reduced      | NA     |
| PD-L1           | 1 | Elevated     | CM     |
| pERK1/2         | 2 | Elevated     | N      |
| Pinin           | 1 | Non-specific | N      |
| PR              | 2 | Reduced      | NA     |
| PTEN            | 1 | Reduced      | NA     |
| RAC1            | 1 | Elevated     | CM     |
| REG4            | 2 | Elevated     | S      |
| S100B           | 1 | Reduced      | NA     |
| SPINK1          | 1 | Elevated     | S      |
| TELOMERASE      | 1 | Reduced      | NA     |
| TFF3            | 1 | Elevated     | C, S   |
| TGF-B           | 1 | Elevated     | N      |
| TNF-A           | 1 | Elevated     | N      |
| TOMM34          | 1 | Reduced      | NA     |
| TR              | 1 | Elevated     | N      |
| WAVE1           | 1 | Elevated     | C      |

1. Name as reported in the original study.

2. Non-specific: has high or ubiquitous expression in other normal tissues; Reduced: reduced or insignificant expression in MOC compared to ovarian stromal tissue; Elevated: higher expression in MOC than control or normal tissues.

3. NA, not assessed; CS, cell surface; CM, cell membrane; E, endosome; C, cytoplasmic; N, nuclear; S, secreted; M, mitochondrial; G, Golgi Apparatus; ER, endoplasmic reticulum.

A further literature search was conducted with improved search terms. Table 2 below displays the targets that were localised to the cellular membrane and that fulfilled inclusion criteria.

**Table 2** Characteristics of included proteins using the revised search strategy.

| Protein <sup>1</sup> | Number of Included Studies | Expression in MOC compared to controls/other tissues <sup>2</sup> | Cellular localisation <sup>3</sup> |
|----------------------|----------------------------|-------------------------------------------------------------------|------------------------------------|
| CEACAM5              | 1                          | Elevated                                                          | CM                                 |
| CEACAM6              | 1                          | Elevated                                                          | CM                                 |
| EGFR                 | 4                          | Elevated                                                          | S, CM, N, E                        |
| FOLR1                | 1                          | Elevated                                                          | CM                                 |
| HER2                 | 5                          | Elevated                                                          | CM                                 |
| MUC1                 | 3                          | Elevated                                                          | CM                                 |

1. Name as reported in the original study.

2. Non-specific: has high or ubiquitous expression in other normal tissues; Reduced: reduced or insignificant expression in MOC compared to ovarian stromal tissue; Elevated: higher expression in MOC than control or normal tissues.

3. NA, not assessed; CS, cell surface; CM, cell membrane; E, endosome; C, cytoplasmic; N, nuclear; S, secreted; M, mitochondrial; G, Golgi Apparatus; ER, endoplasmic reticulum.

**Table 3** Characteristics of proteins in proteomic studies

| Protein <sup>1</sup>                                                  | Expression in MOC compared to controls/other tissues <sup>2</sup> | Cellular Localisation <sup>3</sup> |
|-----------------------------------------------------------------------|-------------------------------------------------------------------|------------------------------------|
| CEA5 (CEACAM5)                                                        | Elevated                                                          | CM, CS                             |
| CEA6 (CEACAM6)                                                        | Elevated                                                          | CM, CS                             |
| MUC1                                                                  | Elevated                                                          | CM                                 |
| MUC2                                                                  | Elevated                                                          | S                                  |
| MUC5B                                                                 | Elevated                                                          | S                                  |
| ACE-like protein (ACE2)                                               | Elevated                                                          | S, CM, C                           |
| 60 kDa heat shock protein, mitochondrial                              | Elevated                                                          | M                                  |
| Fc fragment of IgG binding protein FCGBP                              | Elevated                                                          | S                                  |
| Pancreatic secretory granule membrane major glycoprotein GP2 (GP2)    | Elevated                                                          | S, CM                              |
| Protein tyrosine phosphatase (PTPRN2)                                 | Elevated                                                          | CM, C                              |
| C-terminal fragment of the 11S proteasome activator (PA28, Reg alpha) | Elevated                                                          | C, N                               |
| Serpin B5                                                             | Elevated                                                          | S                                  |

1. Name as reported in the original study, with the common name in brackets.

2. Non-specific: has high or ubiquitous expression in other normal tissues; Reduced: reduced or insignificant expression in MOC compared to ovarian stromal tissue; Elevated: higher expression in MOC than control or normal tissues.

3. NA, not assessed; CS, cell surface; CM, cell membrane; E, endosome; C, cytoplasmic; N, nuclear; S, secreted; M, mitochondrial; G, Golgi Apparatus; ER, endoplasmic reticulum.
