# Supplementary material for: The Protein Landscape of Mucinous Ovarian Cancer: Towards a Theranostic
Source: MDPI journal article supplement (doi:10.3390/cancers13225596), 2021-11-09
Supplement: s1 [file s1]

## Supplementary File S1: Search Strategy

### 1. Key words

| Population                                                                                                                                                                       | Exposure                                                                    |
|----------------------------------------------------------------------------------------------------------------------------------------------------------------------------------|-----------------------------------------------------------------------------|
| Mucinous ovarian cancer<br>Mucinous ovarian carcinoma<br>Epithelial ovarian cancer<br>Epithelial ovarian carcinoma<br>Type I-II tumours<br>Ovarian carcinoma<br>Ovarian neoplasm | Proteomics<br>Immunohistochemistry<br>Targeted therapy<br>Molecular therapy |

### 2. Ovid MEDLINE (2010-2021)

1. exp Proteomics/
2. proteomic\*.mp.
3. exp Immunohistochemistry/
4. immunohistochemistry.mp.
5. theranostic\*.mp.
6. 1 OR 2 OR 3 OR 4 OR 5
7. mucinous ovar\*.mp.
8. 6 AND 7

### 3. PUBMED (2010-2021)

1. "Proteomics"[Mesh]
2. proteomic\*
3. "Immunohistochemistry"[Mesh]
4. immunohistochemistry
5. theranostic\*
6. 1 OR 2 OR 3 OR 4 OR 5
7. "mucinous ovar\*"
8. 6 AND 7

### 4. Google Scholar (2010-2020)

Search: ((proteomics) OR (theranostic) OR (theranostics)) AND (("mucinous ovarian cancer") OR ("mucinous ovarian carcinoma"))

### 5. Ovid MEDLINE (2010-2021)

1. exp Ovarian Neoplasms/
2. "mucinous\*".af.
3. Adenocarcinoma, Mucinous/
4. "ovar\*".af.
5. (mucinous\* adj4 ovar\*).af.
6. 1 AND 2
7. 3 AND 4
8. 5 OR 6 OR 7
9. exp Proteomics/
10. exp mass spectrometry/
11. "spectrometr\*".af.

12. "proteo\*".af.  
 13.9 OR 10 OR 11 OR 12  
 14.8 AND 13

## 6. PUBMED (2010-2021)

1. "Ovarian Neoplasms"[Mesh]
2. Mucinous\*
3. "Adenocarcinoma, Mucinous"[Mesh]
4. Ovar\*
5. 1 AND 2
6. 3 AND 4
7. 5 OR 6
8. "Proteomics"[Mesh]
9. "Mass Spectrometry"[Mesh]
10. Spectrometr\*
11. Proteo\*
- 12.8 OR 9 OR 10 OR 11
- 13.7 and 12

## 7. Inclusion and exclusion criteria

### Immunohistochemistry

| Inclusion criteria                                                                               | Exclusion criteria                                                                                                                                                                                                                                                                                                                                                                                      |
|--------------------------------------------------------------------------------------------------|---------------------------------------------------------------------------------------------------------------------------------------------------------------------------------------------------------------------------------------------------------------------------------------------------------------------------------------------------------------------------------------------------------|
| Studies that assessed protein expression profiles via immunohistochemistry in MOC tissue samples | Serum analysis only<br>Immunohistochemistry was not used to quantify protein expression profiles<br>Did not present data on immunohistochemistry findings specific to primary MOC<br>Sample size $\leq 5$ , unless supported by other studies<br>Experimental analyses were not performed<br>Language other than English<br>Abstract or full text was not available<br>Published prior to the year 2010 |

### Proteomics

| Inclusion criteria                                                                    | Exclusion criteria                                                                                                                                                                                                                                                                                                     |
|---------------------------------------------------------------------------------------|------------------------------------------------------------------------------------------------------------------------------------------------------------------------------------------------------------------------------------------------------------------------------------------------------------------------|
| Studies that investigated aberrant protein expression by means of proteomic analysis. | Serum analysis only<br>Proteomics was not used to quantify protein expression profiles<br>Did not present data on proteomic findings specific to primary MOC<br>Experimental analyses were not performed<br>Language other than English<br>Abstract or full text was not available<br>Published prior to the year 2010 |

An additional search was conducted using:

((("ovarian neoplasms"[MeSH Terms] OR ("ovarian"[All Fields] AND "neoplasms"[All Fields]) OR "ovarian neoplasms"[All Fields] OR ("ovarian"[All Fields] AND "cancer"[All Fields]) OR "ovarian cancer"[All Fields]) AND ("mucine"[All Fields] OR "mucines"[All Fields] OR "mucinous"[All Fields] OR "mucins"[MeSH Terms] OR "mucins"[All Fields] OR "mucin"[All Fields]) AND ("immunohistochemistries"[All Fields] OR "immunohistochemistry"[MeSH Terms] OR "immunohistochemistry"[All Fields])) AND (2010:2021[pdat])

And was filtered to obtain further detail on the proteins in Table 1.
